# Supplementary material for: Aggregation-induced emission effect on turn-off fluorescent switching of a photochromic diarylethene
Source: publisher site journal article supplement (doi:10.3762/bjoc.15.217), 2019-09-20
Supplement: Additional file 1 [file 1860-5397-15-217-S1.pdf]

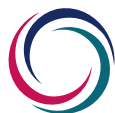

## Supporting Information

for

### Aggregation-induced emission effect on turn-off fluorescent switching of a photochromic diarylethene

Luna Kono, Yuma Nakagawa, Ayako Fujimoto, Ryo Nishimura, Yohei Hattori, Toshiki Mutai, Nobuhiro Yasuda, Kenichi Koizumi, Satoshi Yokojima, Shinichiro Nakamura and Kingo Uchida

*Beilstein J. Org. Chem.* **2019**, *15*, 2204–2212. [doi:10.3762/bjoc.15.217](https://doi.org/10.3762/bjoc.15.217)

### X-ray analysis data of a single crystal of 1o

## Table of Contents

1. **Figure S1:** Molecular structure of **1o** in crystalline state. **S2**
2. **Table S1:** Single crystalline analysis data of **1o**. **S3**

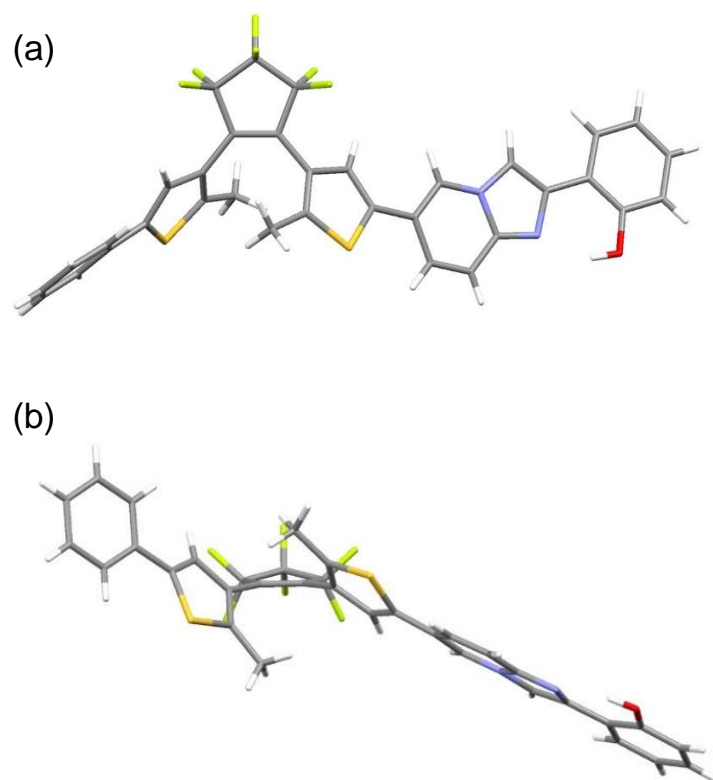

**Figure S1:** Molecular structure of **1o** in crystalline state, (a) front view, (b) top view.

**Table S1:** Single crystalline analysis data of **1o**.

| <b>1o</b>                          |                                                                               |
|------------------------------------|-------------------------------------------------------------------------------|
| Formula                            | C <sub>34</sub> H <sub>22</sub> F <sub>6</sub> N <sub>2</sub> OS <sub>2</sub> |
| formula weight                     | 652.65                                                                        |
| <i>T</i> / K                       | 173(2)                                                                        |
| crystal system                     | triclinic                                                                     |
| space group                        | P-1                                                                           |
| <i>a</i> / Å                       | 8.7814(3)                                                                     |
| <i>b</i> / Å                       | 10.9787(4)                                                                    |
| <i>c</i> / Å                       | 16.5659(5)                                                                    |
| $\alpha$ / °                       | 107.795(2)                                                                    |
| $\beta$ / °                        | 100.339(2)                                                                    |
| $\gamma$ / °                       | 96.313(2)                                                                     |
| <i>V</i> / Å <sup>3</sup>          | 1472.65(9)                                                                    |
| <i>Z</i>                           | 2                                                                             |
| <i>R</i> <sub>1</sub> (I > 2s(I))  | 0.0446                                                                        |
| <i>wR</i> <sub>2</sub> (I > 2s(I)) | 0.0999                                                                        |
| <i>R</i> <sub>1</sub> (all data)   | 0.0806                                                                        |
| <i>wR</i> <sub>2</sub> (all data)  | 0.1457                                                                        |
| CCDC No.                           | 1920569                                                                       |
